# Supplementary material for: A cross-scale framework for evaluating flexibility values of battery and fuel cell electric vehicles
Source: PubMed Central journal article supplement (PMC10766983; doi:10.1038/s41467-023-43884-x), 2024-01-04
Supplement: 41467_2023_43884_MOESM1_ESM.pdf [file 41467_2023_43884_MOESM1_ESM.pdf]

1 **Supplementary Information for**  
2 **A Cross-Scale Framework for Evaluating Flexibility Values of Battery and Fuel**  
3 **Cell Electric Vehicles**

4 Ruixue Liu<sup>1\*</sup>, Guannan He<sup>2,3,4,5\*†</sup>, Xizhe Wang<sup>1</sup>, Dharik Mallapragada<sup>6</sup>, Hongbo  
5 Zhao<sup>7</sup>, Yang Shao-Horn<sup>6,8,9,10†</sup>, Benben Jiang<sup>1†</sup>

6 \* These authors contributed equally to this work  
7 † Corresponding authors: gnhe@pku.edu.cn, shaohorn@mit.edu,  
8 bbjiang@tsinghua.edu.cn.  
9

10  
11 **Affiliations**

12 1 Department of Automation, Beijing National Research Center for Information  
13 Science and Technology, Tsinghua University, Beijing, China

14 2 Department of Industrial Engineering and Management, College of Engineering,  
15 Peking University, Beijing, China

16 3 National Engineering Laboratory for Big Data Analysis and Applications, Peking  
17 University, Beijing, China

18 4 Institute of Carbon Neutrality, Peking University, Beijing, China

19 5 Peking University Changsha Institute for Computing and Digital Economy, Beijing,  
20 China

21 6 MIT Energy Initiative, Massachusetts Institute of Technology, 77 Massachusetts  
22 Avenue, Cambridge, MA, USA

23 7 Department of Chemical and Biological Engineering, Princeton University, Princeton,  
24 NJ, USA

25 8 Department of Mechanical Engineering, Massachusetts Institute of Technology, 77  
26 Massachusetts Avenue, Cambridge, MA, USA

27 9 Research Lab of Electronics, Massachusetts Institute of Technology, 77  
28 Massachusetts Avenue, Cambridge, MA, USA

29 10 Department of Materials Science and Engineering, Massachusetts Institute of  
30 Technology, 77 Massachusetts Avenue, Cambridge, MA, USA

31

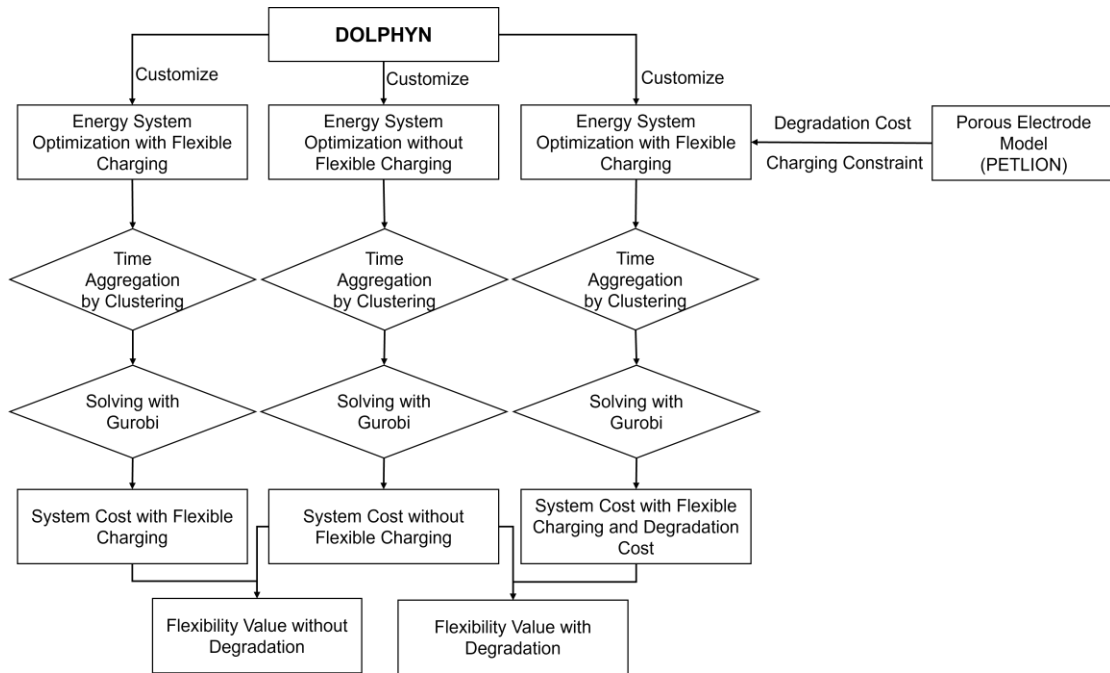

33

34 **Supplementary Figure 1.** The flow diagram for flexibility value computation of  
 35 FCEVs and BEVs with battery degradation considered. The DOLPHYN model is  
 36 customized for energy systems with different flexible charging settings, i.e. energy  
 37 system with flexible charging, without flexible charging, and with flexible charging and  
 38 battery degradation cost considered. The degradation cost is computed by Eq.(8) in the  
 39 “Methods-Degradation cost calculation” Section with the cycle life  $L_{bat}$  obtained by a  
 40 micro-level porous electrode theory-based model. After selecting several representative  
 41 weeks from 7-year data of renewable generation and electricity demand using clustering  
 42 techniques, the optimization problems under operational constraints are solved by  
 43 Gurobi with barrier methods. Then the least system costs of energy systems with and  
 44 without flexible charging, and with flexible charging and degradation cost are obtained  
 45 (Eq. 1-4 in the “Methods-Flexibility value calculation” Section). Finally, the flexibility  
 46 values are figured out by computing the difference values between corresponding  
 47 optimized least system costs (Eq. 5-7 in the “Methods-Flexibility value calculation”  
 48 Section).

49

50

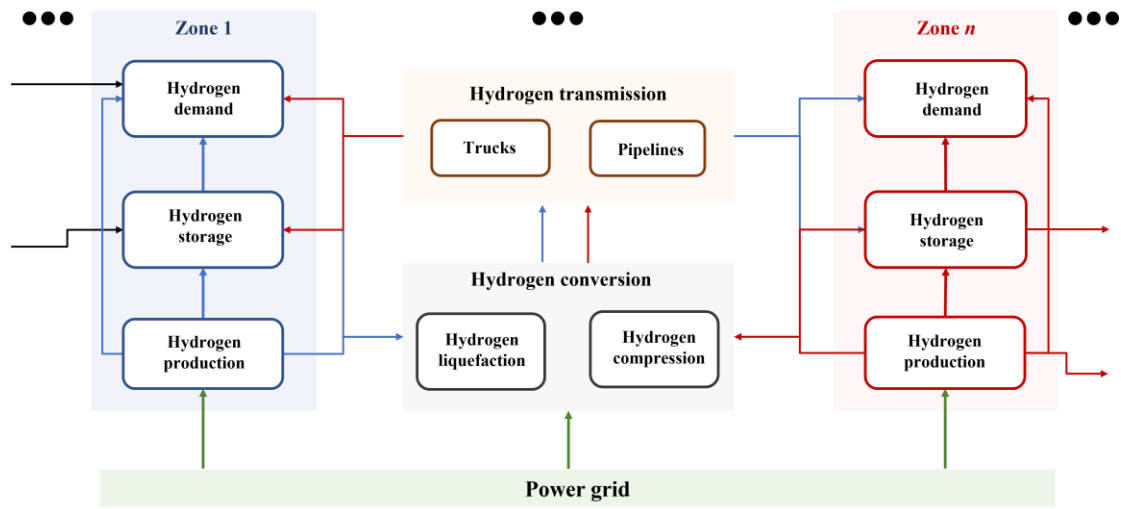

51

52 **Supplementary Figure 2.** The schematic of the hydrogen supply chain involved in the

53 DOLPHYN model.

54

55

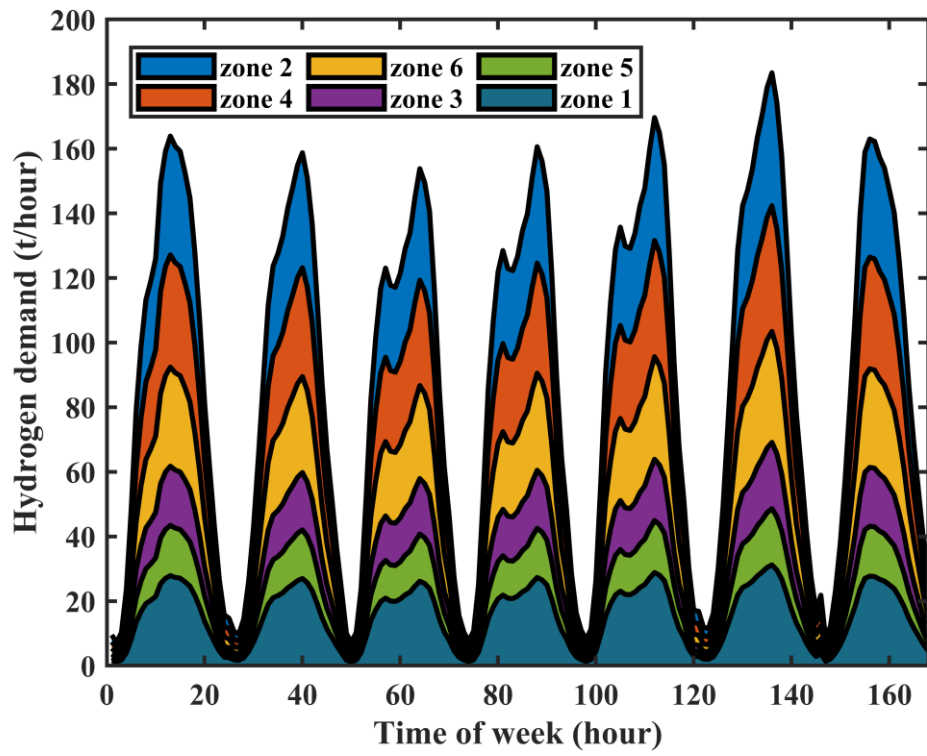

57

58 **Supplementary Figure 3. Hydrogen demand at different zones.** Hourly H<sub>2</sub> demands  
59 profiles for each zone. Corresponding zones are shown in Ref. 1.

60

61

62

63

64

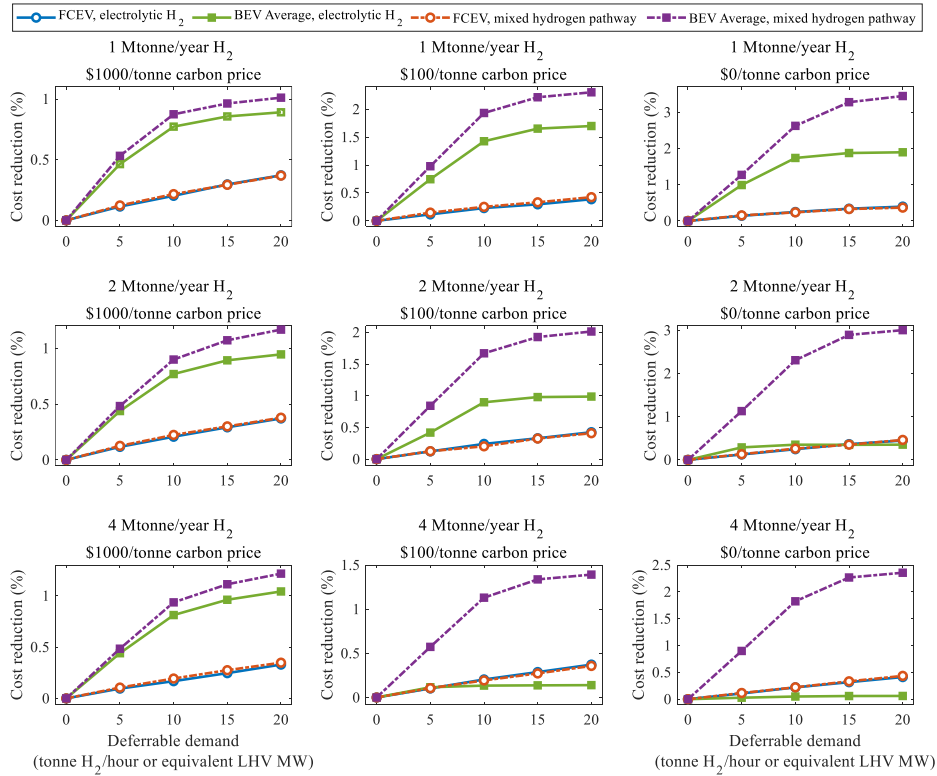

65

66 **Supplementary Figure 4.** The net values of flexible BEV and FCEV charging with a  
67 charging window of 1 h under different hydrogen pathways. The lines with circle  
68 markers denote the flexibility values of FCEVs, while the lines with solid square  
69 markers denote those of BEVs. The solid lines represent the electrolytic hydrogen only  
70 pathway, and the dashed-dotted lines are for the mixed hydrogen pathway incorporating  
71 both natural gas with carbon capture and storage (NG with CCS) and electrolytic  
72 generation.

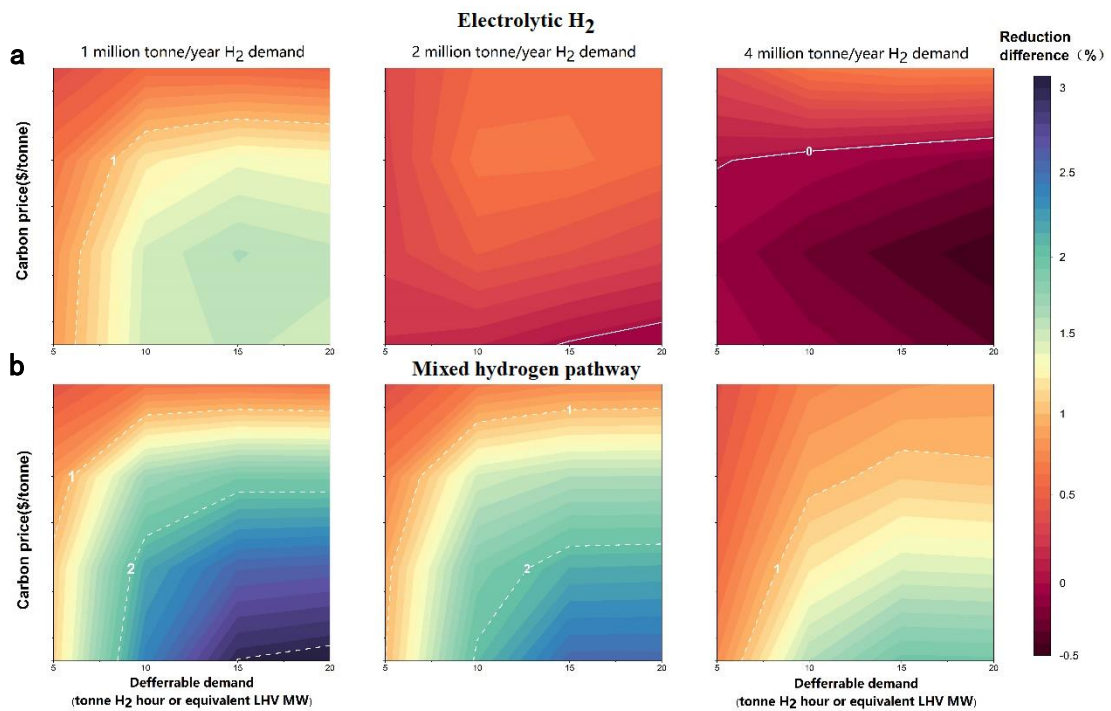

74

75 **Supplementary Figure 5.** The net value (system cost reduction) difference between  
 76 flexible BEV and FCEV charging with a charging window of 1 h in different hydrogen  
 77 generation pathways. **a.** Using electrolysis only for hydrogen production (namely,  
 78 “Electrolytic H<sub>2</sub>”), **b.** Using both electrolysis and NG with CCS, namely, “Mixed  
 79 hydrogen pathway”. Panels from left to right are for the H<sub>2</sub> demand of 1 Mtonne/year,  
 80 2 Mtonne/year, and 4 Mtonne/year. The vertical coordinates are for different carbon  
 81 prices. And the colors from red to blue denote gap magnitudes of flexibility values of  
 82 BEVs and FCEVs.

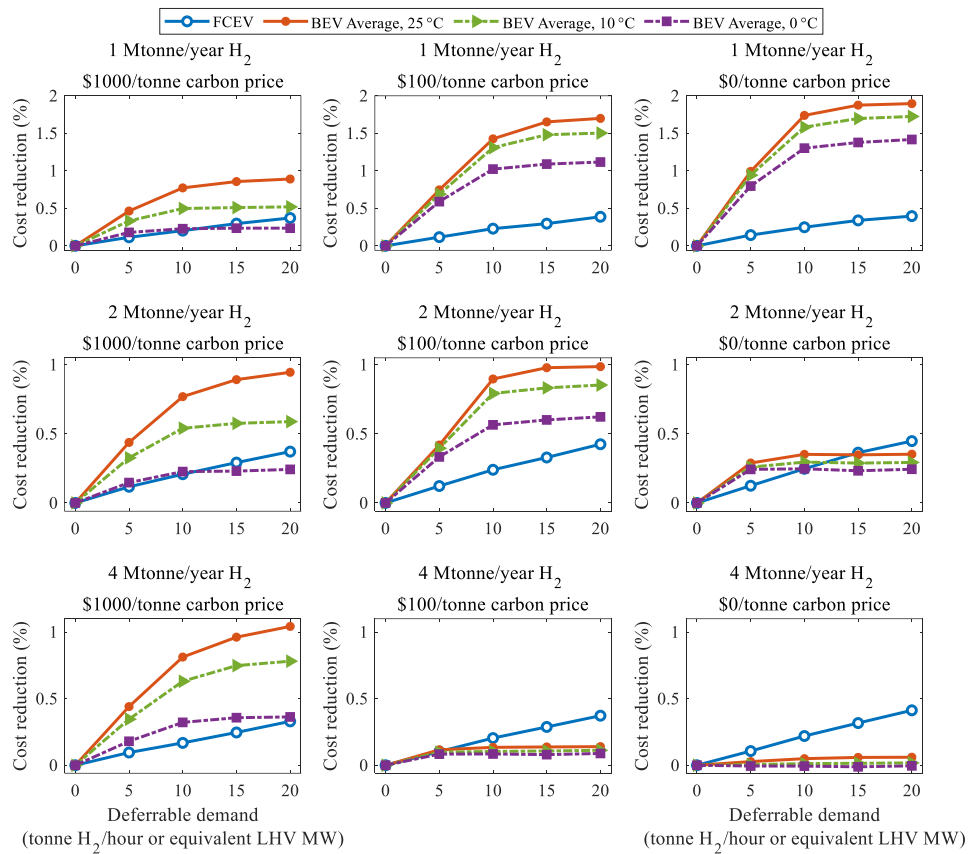

84

85 **Supplementary Figure 6.** The net values of flexible BEV and FCEV charging under a  
 86 range of service temperatures. The blue lines with circle markers denote the cost  
 87 reduction due to the flexibility of FCEVs. The lines in orange, green, and purple  
 88 indicate the flexibility values of the BEV average charged within 1 h at 25°C (marked  
 89 as “BEV Average, 25°C”), at 10°C (marked as “BEV Average, 10°C”), and at 0°C  
 90 (marked as “BEV Average, 0°C”), respectively.

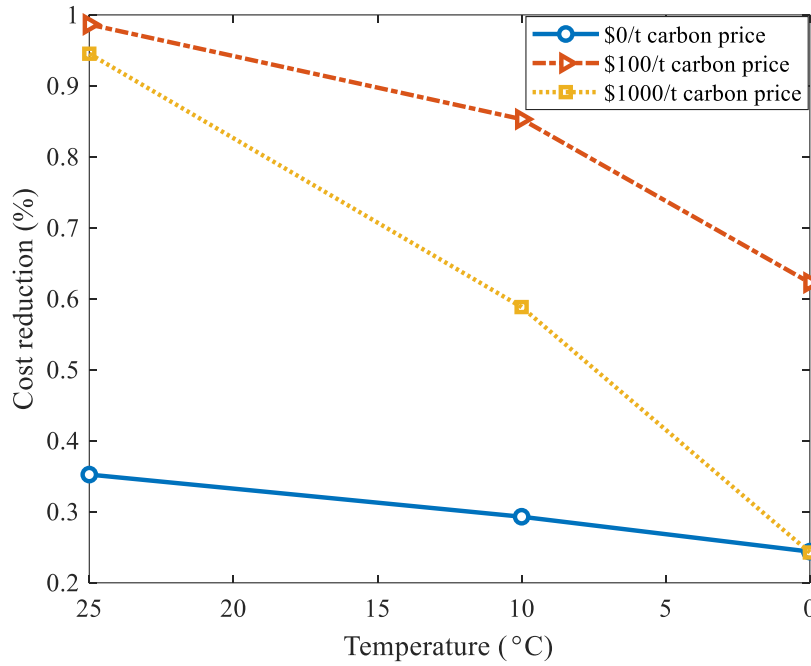

91

92 **Supplementary Figure 7.** The cost reduction of the BEV Average case with 20%  
 93 deferrable demand and 2 million tonne/year H<sub>2</sub> demand at different temperatures. The  
 94 blue, orange, and yellow lines are for carbon prices of \$0, \$100, and \$1000 per tonne,  
 95 respectively. A nonlinear relationship between the cost reduction and temperature of  
 96 BEVs is observed, with a steeper slope at a colder temperature.



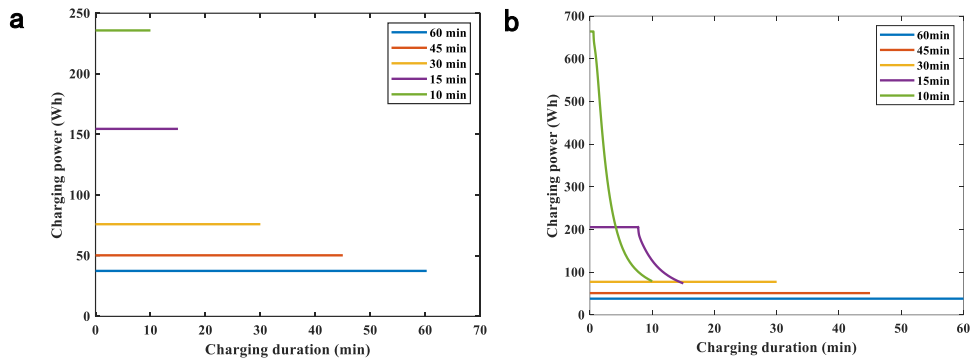

97

98 **Supplementary Figure 8.** Charging protocols for the five charging-time demands of

99 60 min, 45 min, 30 min, 15 min, and 10 min. **a.** Charging protocols at 25 °C and 10 °C.

100 **b.** Charging protocols at 0 °C. At 0 °C, larger constant power is required at fast charging

101 conditions. Then, constant voltage (CV) charging exists in these fast-charging protocols,

102 such as 15 min or 10 min. The proportion of constant power (CP) charging duration

103 decreases as the total charging time becomes shorter.

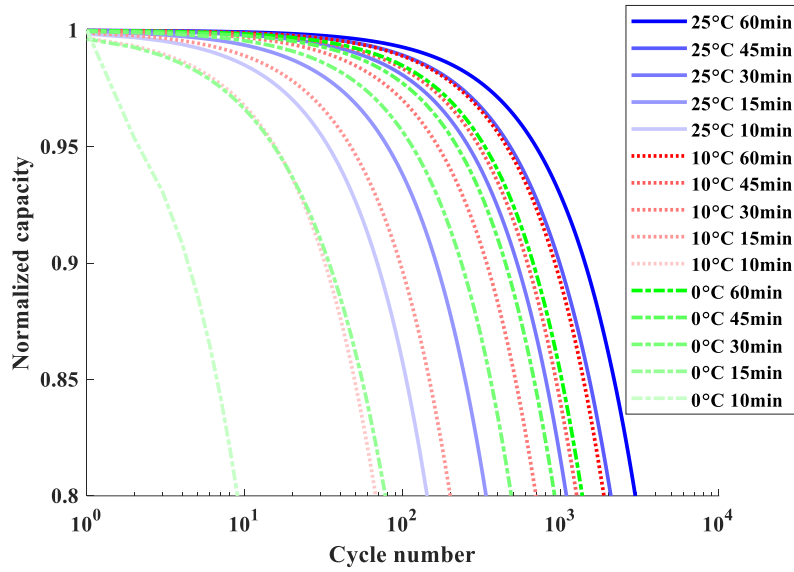

104

105 **Supplementary Figure 9.** Battery degradation trajectories as battery cycling, using  
 106 different charging protocols at various service temperatures. Blue-solid, red-dotted, and  
 107 green-dashed-dotted lines denote 25 °C, 10 °C, and 0 °C, respectively. Gradually  
 108 changing colors from deep to shallow represent the corresponding charging duration  
 109 time from long to short. The battery cycle life defined here is the cycle number  
 110 corresponding to a reduction in the cell capacity to 80% of the nominal capacity.

111 **Supplementary Table 1.** Parameters for generation and storage technologies in the  
 112 power sector for the year 2045<sup>2,3</sup>. CAPEX: capital cost; FOM: fixed operational and  
 113 maintenance cost; VOM: variable operational and maintenance cost; PV: photovoltaic;  
 114 CCGT: combined cycle gas turbine; OCGT: open cycle gas turbine; CCGT w/CCS:  
 115 combined cycle gas turbine with carbon capture and storage.

| Technology                            | Onshore Wind | Offshore Wind | Utility PV | Distributed PV | Li-ion Battery | Pumped Hydro | CCGT | OCGT | CCGT w/CCS | Nuclear |
|---------------------------------------|--------------|---------------|------------|----------------|----------------|--------------|------|------|------------|---------|
| Power CAPEX (10 <sup>3</sup> \$/MW)   | 1074         | 2179          | 725        | 882            | 119            | 1966         | 936  | 854  | 2080       | 6048    |
| Energy CAPEX (10 <sup>3</sup> \$/MWh) | --           | --            | --         | --             | 136            | --           | --   | --   | --         | --      |
| FOM (10 <sup>3</sup> \$/MW-year)      | 35           | 59            | 8          | 6              | 2              | 44           | 13   | 11   | 27         | 119     |
| VOM (\$/MWh)                          | --           | --            | --         | --             | 3              | --           | 2    | 4    | 6          | 2       |
| Heat Rate (MMBTU/MWh)                 | --           | --            | --         | --             | --             | --           | 6    | 10   | 8          | 10      |
| Round-trip Efficiency                 | --           | --            | --         | --             | 85%            | 80%          | --   | --   | --         | --      |
| Lifetime (years)                      | 30           | 30            | 30         | 30             | 15             | 50           | 30   | 30   | 30         | 30      |

116

117 **Supplementary Table 2.** Parameters for H<sub>2</sub> generation and gas-to-power (G2P)  
 118 technologies. CAPEX: capital cost; SMR: steam methane reformer; SMR w/CCS:  
 119 steam methane reformer with carbon capture and storage (CCS); CCGT: combined  
 120 cycle gas turbine.

|                                                                      | Electrolysis <sup>4</sup>  | SMR <sup>4</sup>                   | SMR w/CCS <sup>4</sup>              | Fuel Cell <sup>5</sup>  | CCGT-H <sub>2</sub> <sup>2</sup> |
|----------------------------------------------------------------------|----------------------------|------------------------------------|-------------------------------------|-------------------------|----------------------------------|
| Unit CAPEX                                                           | 300-700 \$/kW <sub>e</sub> | 910 \$/kW <sub>H<sub>2</sub></sub> | 1280 \$/kW <sub>H<sub>2</sub></sub> | 1264 \$/kW <sub>e</sub> | 1171 \$/kW <sub>e</sub>          |
| Lifetime<br>(years)                                                  | 10                         | 25                                 | 25                                  | 10                      | 25                               |
| Efficiency<br>(LHV)                                                  | 74%                        | 76%                                | 69%                                 | 60%                     | 65%                              |
| Emission Intensity<br>(tonne CO <sub>2</sub> /tonne H <sub>2</sub> ) | 0                          | 8.9                                | 1.0                                 | 0                       | 0                                |

121

122 **Supplementary Table 3.** Parameters for H<sub>2</sub> transmission and storage technologies.  
 123 CAPEX: capital cost; OPEX: operational cost; A: cost and electricity consumption  
 124 proportional to pipeline length; B: cost and electricity consumption irrelevant to  
 125 pipeline length; C: truck and tank storage compression related costs and electricity  
 126 consumption.

|                                                 | Pipeline                     | Gas Tank                    | Liquid Truck               | Gas Truck                |
|-------------------------------------------------|------------------------------|-----------------------------|----------------------------|--------------------------|
| Unit capacity                                   | 38.8 tonne/hour <sup>4</sup> | 0.3 tonne <sup>6</sup>      | 4 tonne <sup>6</sup>       | 0.3 tonne <sup>6</sup>   |
| CAPEX                                           | 3.72 M\$/mile <sup>4,7</sup> | 0.58 M\$/tonne <sup>6</sup> | 0.2 M\$/tonne <sup>6</sup> | 1 M\$/tonne <sup>6</sup> |
| Compression CAPEX (A)<br>(\$/mile-unit)         | 700 <sup>8,9</sup>           | 0                           | 0                          | 0                        |
| Compression CAPEX (B)<br>(M\$/unit)             | 0.75                         | 0                           | 0                          | 0                        |
| Compression Electricity (A)<br>(MWh/tonne-mile) | 0.014                        | 0                           | 0                          | 0                        |
| Compression Electricity (B)<br>(MWh/tonne)      | 1                            | 0                           | 0                          | 0                        |
| Unit OPEX (\$/mile)                             | 0                            | 0                           | 1.5                        | 1.5                      |
| Compression CAPEX (C)<br>(\$/(tonne/hr))        | 0                            | 0.5 <sup>6</sup>            | 32 <sup>6</sup>            | 1.5 <sup>6</sup>         |
| Compression Electricity (C)<br>(MWh/tonne)      | 0                            | 2 <sup>8,9</sup>            | 11 <sup>8,9</sup>          | 1 <sup>8,9</sup>         |
| Boil-off Rate                                   | 0                            | 0                           | 3%                         | 0                        |
| Lifetime (years)                                | 40                           | 12                          | 12                         | 12                       |

127

128 **Supplementary Table 4.** Additional parameters of the DOLPHYN model.

|                                                 |              |
|-------------------------------------------------|--------------|
| Discount Rate                                   | 5.4%         |
| Power Transmission Expansion Cost               | 1600/MW-mile |
| Power Transmission Loss                         | 1%/100 miles |
| Value of Lost Load (Electricity)                | \$20,000/MWh |
| Value of Lost Load (Hydrogen)                   | \$1,000/kg   |
| Gas Price                                       | \$5.4/MMBTU  |
| CO <sub>2</sub> Transportation and Storage Cost | \$20/tonne   |

129

130 **Supplementary Table 5.** Battery parameters for BEVs (the Base column) and the  
 131 sensitivity to electrode thickness and porosity<sup>10,11</sup>.

| Cell Parameters              | Base        | -10% Cathode thickness | +10% Cathode thickness | -10% Anode thickness | +10% Anode thickness | +10% Cathode porosity | -10% Cathode porosity | +10% Anode porosity | -10% Anode porosity | -20% Cathode thickness | +20% Cathode thickness |
|------------------------------|-------------|------------------------|------------------------|----------------------|----------------------|-----------------------|-----------------------|---------------------|---------------------|------------------------|------------------------|
| Electrode Length (m)         | 0.3         | 0.3                    | 0.3                    | 0.3                  | 0.3                  | 0.3                   | 0.3                   | 0.3                 | 0.3                 | 0.3                    | 0.3                    |
| Electrode Width (m)          | 0.1         | 0.1                    | 0.1                    | 0.1                  | 0.1                  | 0.1                   | 0.1                   | 0.1                 | 0.1                 | 0.1                    | 0.1                    |
| Layers Per cell (m)          | 20          | 20                     | 20                     | 20                   | 20                   | 20                    | 20                    | 20                  | 20                  | 20                     | 20                     |
| Voltage                      | 4.2         | 4.2                    | 4.2                    | 4.2                  | 4.2                  | 4.2                   | 4.2                   | 4.2                 | 4.2                 | 4.2                    | 4.2                    |
| <b>Anode</b>                 | <b>LiC6</b> |                        |                        |                      |                      |                       |                       |                     |                     |                        |                        |
| Thickness (m)                | 4.8e-5      | 4.8e-5                 | 4.8e-5                 | 4.32e-5              | 5.28e-5              | 4.8e-5                | 4.8e-5                | 4.8e-5              | 4.8e-5              | 4.8e-5                 | 4.8e-5                 |
| Porosity                     | 0.3         | 0.3                    | 0.3                    | 0.3                  | 0.3                  | 0.3                   | 0.3                   | 0.33                | 0.27                | 0.3                    | 0.3                    |
| Volume (m <sup>3</sup> )     | 2.88e-5     | 2.88e-5                | 2.88e-5                | 2.592e-5             | 3.168e-5             | 2.88e-5               | 2.88e-5               | 2.88e-5             | 2.88e-5             | 2.88e-5                | 2.88e-5                |
| Density (kg/m <sup>3</sup> ) | 2260        | 2260                   | 2260                   | 2260                 | 2260                 | 2260                  | 2260                  | 2260                | 2260                | 2260                   | 2260                   |
| Active Mass (kg)             | 1.95e-2     | 1.95e-2                | 1.95e-2                | 1.76e-2              | 2.15e-2              | 1.95e-2               | 1.95e-2               | 2.15e-2             | 1.76e-2             | 1.95e-2                | 1.95e-2                |
| Energy Density (mAh/g)       | 330         | 330                    | 330                    | 330                  | 330                  | 330                   | 330                   | 330                 | 330                 | 330                    | 330                    |
| Price (\$/kg)                | 15          | 15                     | 15                     | 15                   | 15                   | 15                    | 15                    | 15                  | 15                  | 15                     | 15                     |
| Capacity (Ah)                | 6.4437      | 6.4437                 | 6.4437                 | 5.7993               | 7.0881               | 6.4437                | 6.4437                | 7.0881              | 5.7993              | 6.4437                 | 6.4437                 |
| Cost (\$)                    | 0.2929      | 0.2929                 | 0.2929                 | 0.2636               | 0.3222               | 0.2929                | 0.2929                | 0.3222              | 0.2636              | 0.2929                 | 0.2929                 |
| <b>Cathode</b>               | <b>NMC</b>  |                        |                        |                      |                      |                       |                       |                     |                     |                        |                        |
| Thickness (m)                | 4.16e-5     | 3.744e-5               | 4.576e-5               | 4.16e-5              | 4.16e-5              | 4.16e-5               | 4.16e-5               | 4.16e-5             | 4.16e-5             | 3.328e-5               | 4.992e-5               |
| Porosity                     | 0.3         | 0.3                    | 0.3                    | 0.3                  | 0.3                  | 0.3                   | 0.3                   | 0.33                | 0.27                | 0.3                    | 0.3                    |
| Volume (m <sup>3</sup> )     | 2.50e-5     | 2.246e-5               | 2.746e-5               | 2.50e-5              | 2.50e-5              | 2.50e-5               | 2.50e-5               | 2.50e-5             | 2.50e-5             | 1.997e-5               | 2.995e-5               |
| Density (kg/m <sup>3</sup> ) | 4670        | 4670                   | 4670                   | 4670                 | 4670                 | 4670                  | 4670                  | 4670                | 4670                | 4670                   | 4670                   |
| Active Mass (kg)             | 3.50e-2     | 3.15e-2                | 3.85e-2                | 3.50e-2              | 3.50e-2              | 3.85e-2               | 3.15e-2               | 3.50e-2             | 3.50e-2             | 2.80e-2                | 4.20e-2                |
| Energy Density (mAh/g)       | 170         | 170                    | 170                    | 170                  | 170                  | 170                   | 170                   | 170                 | 170                 | 170                    | 170                    |
| Price (\$/kg)                | 20          | 20                     | 20                     | 20                   | 20                   | 20                    | 20                    | 20                  | 20                  | 20                     | 20                     |
| Capacity (Ah)                | 5.9447      | 5.3503                 | 6.5392                 | 5.9447               | 5.9447               | 6.5392                | 5.3505                | 5.9447              | 5.9447              | 4.7558                 | 7.1337                 |
| Cost (\$)                    | 0.6994      | 0.6294                 | 0.7693                 | 0.6994               | 0.6994               | 0.7693                | 0.6294                | 0.6994              | 0.6994              | 0.5595                 | 0.8393                 |
| Cell Capacity (Wh)           | 24.97       | 22.47                  | 27.06                  | 24.36                | 24.97                | 27.06                 | 22.47                 | 24.97               | 24.36               | 19.97                  | 27.06                  |
| Cell Cost (\$)               | 0.99        | 0.92                   | 1.06                   | 0.96                 | 1.02                 | 1.06                  | 0.92                  | 1.02                | 0.96                | 0.85                   | 1.13                   |
| Number of cell per kWh       | 40.05       | 44.50                  | 36.95                  | 41.06                | 40.05                | 36.95                 | 44.50                 | 40.05               | 41.06               | 50.06                  | 36.95                  |
| Additional cost per kWh      | 0.00        | 1.30                   | -0.49                  | -0.21                | 1.17                 | -0.49                 | 1.30                  | 1.17                | -0.21               | 2.93                   | 2.09                   |
| Cost per kWh                 | 200.00      | 201.30                 | 199.51                 | 199.79               | 201.17               | 199.51                | 201.30                | 201.17              | 199.79              | 202.93                 | 202.09                 |

132

133 **Supplementary Table 6.** Battery cycle life obtained by the PET-based model with  
 134 various charging-time protocols and temperatures. “Average” denotes the mean cycle  
 135 life of the simulated values obtained by four charging-time protocols (60 min, 45 min,  
 136 30 min, 15 min), corresponding to the “Average” case in the manuscript. “Extreme”  
 137 indicates that all batteries for the BEV fleet are charged in 10 min.

| Temperature | 60 min | 45 min | 30 min | 15 min | <b>Average</b> | 10 min<br><b>(Extreme)</b> |
|-------------|--------|--------|--------|--------|----------------|----------------------------|
| 25°C        | 2962   | 2074   | 1086   | 337    | 1615           | 143                        |
| 10°C        | 1875   | 1262   | 697    | 200    | 1009           | 68                         |
| 0°C         | 1368   | 915    | 487    | 78     | 712            | 9                          |

138



139 **Supplementary Note 1. Charging protocol design**

140 Batteries are cycled during the 30%–80% state of charge to avoid overcharging or  
141 overdischarging, with various charging protocols but identical constant current  
142 discharging protocols. The constant power constant voltage (CP-CV) charging strategy  
143 is applied. CV charging is used after CP charging hitting the upper cutoff voltage. In  
144 our simulation, CV charging only occurs in situations with a lower temperature of 0 °C  
145 and a shorter charging duration of 10-min or 15-min (Supplementary Fig. 5b). Various  
146 charging protocols are defined by different charging durations of 60 min, 45 min, 30  
147 min, 15 min, and 10 min. The charging protocols at different temperatures are shown  
148 in Supplementary Fig. 5. All the batteries are discharged by the constant current (CC)  
149 protocol at a 1C rate.

## 150 **Supplementary Note 2. Battery degradation**

151 The capacity degradation trajectories of batteries for BEVs under various charging  
152 protocols and service temperatures are displayed in Supplementary Fig. 6. The  
153 differences between battery degradation trajectories at 25°C (solid lines) illustrate that  
154 the battery cycle life shortens as decreasing charging time. Large gaps between  
155 gradually lighter blue lines indicate that when charging time is less than 30 min, the  
156 degradation of battery is considerably faster than that of longer charging times, with a  
157 notably reduced cycle life observed. Similar phenomena can also be observed from  
158 these trajectories at 10°C (dotted lines) and at 0°C (dashed-dotted lines). At 25°C, the  
159 battery cycle life with 15 min charging reduces by 88.6% compared with that with 60  
160 min charging, while the reduction ratio reaches 95.2% for 10 min charging. The battery  
161 lifetime decreases by more than 60% when charging time becomes half shorter. As  
162 battery cycling, solid electrolyte interface (SEI) grows at the anode, which decreases  
163 the anode porosity and increases the overpotential and the transport resistance of Li-  
164 ions<sup>12</sup>. The increasing impedance reduces capacity due to increased voltage loss during  
165 discharge. When the overpotential is significantly large, lithium plating at the anode is  
166 preferred compared to intercalation into the graphite. Lithium plating further decreases  
167 the porosity and accelerates the impedance build-up and capacity degradation.

168 Using the same charging protocol, the battery lifetimes decrease by over 30% and  
169 50% at 10°C and 0°C, respectively, compared with those at 25°C. For the five charging  
170 protocols from long to short duration, the cycle life reduction ratios at 10°C are 36.7%,  
171 39.2%, 35.8%, 40.6%, and 52.4%, in contrast to the cycle lives at 25°C. Compared with  
172 those at 10°C, the corresponding reduction ratios at 0°C are 27.0%, 27.5%, 30.1%,  
173 61.0%, and 86.8%. The results show that batteries degrade nonlinearly as temperature  
174 decreases. Especially under 10 min charging, the lifetime at 0°C decreases up to a

175 93.7% compared with that at 25°C and with 60 min charging. The reason is that a lower  
176 temperature could facilitate porosity shrinkage and slow down the lithium-ion  
177 transport, which worsens lithium plating and thereby impedes lithium-ion intercalation.

178 **Supplementary References**

- 179 1. He, G., Mallapragada, D. S., Bose, A., Heuberger, C. F. & Gençer, E. Hydrogen  
180 supply chain planning with flexible transmission and storage scheduling. *IEEE*  
181 *Trans. Sustain. Energy* 12, 1730–1740 (2021).
- 182 2. National Renewable Energy Laboratory, 2021 Annual Technology Baseline (ATB),  
183 2021, <https://atb.nrel.gov/>.
- 184 3. U.S. Energy Information Administration, Annual Energy Outlook 2018, With  
185 Projections to 2050, 2018.
- 186 4. The Future of Hydrogen, IEA technical report, 2019.
- 187 5. Manufacturing Cost Analysis of 100 and 250 kW Fuel Cell Systems for Primary  
188 Power and Combined Heat and Power Applications, Battelle Memorial Institute  
189 technical report, 2016.
- 190 6. C. Yang and J. Ogden, Determining the lowest-cost hydrogen delivery mode. *Int. J.*  
191 *Hydrogen Energy*, 32, 268–286, 2007.
- 192 7. North American Midstream Infrastructure Through 2035 – A Secure Energy Future  
193 Report, The INGAA Foundation, Inc. technical report, 2014.
- 194 8. S. Schoebnung, Economic Analysis of Large-Scale Hydrogen Storage for  
195 Renewable Utility Applications, Sandia National Laboratories report, 2011.
- 196 9. S. Samsatli and N. J. Samsatli. A multi-objective MILP model for the design and  
197 operation of future integrated multi-vector energy networks capturing detailed  
198 spatio-temporal dependencies. *Appl. Energy*, 220, 893–920, 2018.
- 199 10. Berliner, M. D., Cogswell, D. A., Bazant, M. Z. & Braatz, R. D. Methods—  
200 PETLION: Open-source software for millisecond-scale porous electrode theory-  
201 based lithium-ion battery simulations. *J. Electrochem. Soc.* 168, 090504 (2021).
- 202 11. Ciez RE., Steingart D., Asymptotic Cost Analysis of Intercalation Lithium-Ion  
203 Systems for Multi-hour Duration Energy Storage, *Joule*, 4, 597-614 (2020).
- 204 12. Pinson, M. B. & Bazant, M. Z. Theory of SEI Formation in rechargeable batteries:  
205 Capacity fade, accelerated aging and lifetime prediction. *J. Electrochem. Soc.* 160,  
206 A243–A250, 2013.

207
